# Supplementary material for: Skin Wound Healing Process and New Emerging Technologies for Skin Wound Care and Regeneration
Source: Pharmaceutics. 2020 Aug 5;12(8):735. doi: 10.3390/pharmaceutics12080735 (PMC7463929; doi:10.3390/pharmaceutics12080735)
Supplement: Supplementary file 1 [file pharmaceutics-12-00735-s001.pdf]

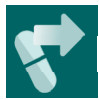

# Supplementary Materials: Skin Wound Healing Process and New Emerging Technologies for Skin Wound Care and Regeneration

Erika Maria Tottoli <sup>1</sup>, Rossella Dorati <sup>1,\*</sup>, Ida Genta <sup>1</sup>, Enrica Chiesa <sup>1</sup>, Silvia Pisani <sup>2</sup> and Bice Conti <sup>1</sup>

<sup>1</sup> Department of Drug Sciences, University of Pavia, V.le Taramelli 12, 27100 Pavia, Italy; erikamaria.tottoli01@universitadipavia.it (E.M.T.); ida.genta@unipv.it (I.G.); enrica.chiesa@unipv.it (E.C.); bice.conti@unipv.it (B.C.);

<sup>2</sup> Immunology and Transplantation Laboratory, Pediatric Hematology Oncology Unit, Department of Maternal and Children's Health, Fondazione IRCCS Policlinico S. Matteo, 27100, Pavia, Italy silvia.pisani01@universitadipavia.it;

\* Correspondence: rossella.dorati@unipv.it; Tel.: +390382987393

---

**Table S1.** Comparative summary of skin wound care and regeneration emergent technologies (technology, application advantages and disadvantages and examples of commercial products).

| Technology                                                             | Application                                                | Advantages                                                                                                                                                                | Disadvantages                                                                                                      | Refs.                  | Examples of commercial products                                |
|------------------------------------------------------------------------|------------------------------------------------------------|---------------------------------------------------------------------------------------------------------------------------------------------------------------------------|--------------------------------------------------------------------------------------------------------------------|------------------------|----------------------------------------------------------------|
| <b>Advanced dressing</b>                                               | Wound care serious injuries with complex healing processes | Active role in wounds treatment stimulation of healing.<br>Wound healing process Synergistic enhance by growth factors addition                                           | Not suitable for broad spectrum applications.<br>Growth factors low absorption capacity                            | [29, 47-49, 51, 54-56] | Cutisorb™,<br>Iodosorb,<br>Actisorb<br>Silver 220,<br>Acticoat |
| <b>Skin grafts</b>                                                     | Skin regeneration, severe surface deficits                 | Restoration of integumentary continuity                                                                                                                                   | Invasive procedures that can expose the patient to serious complications                                           | [50]                   | –                                                              |
| <b>Cellular skin substitutes Fibroblasts, keratinocytes</b>            | Skin regeneration<br>Deep, non-healing wounds              | Actively promote skin regeneration due to their structure and composition<br>Basis for revascularization                                                                  | Limited donor sites, high risk of secondary morbidity.<br>Cannot be applied to all patients with chronic injuries. | [58 - 61]              | Epicel<br>Dermagraft®<br>Apligraf®                             |
| <b>Cellular skin substitutes Epidermal stem cells and progenitors.</b> | Skin regeneration<br>Large size, deep, non-healing wounds. | Autologous cell sources for chronic wound healing<br>Safety and easy isolation from tissues<br>Accelerate wound healing, improve the quality of healing, and angiogenesis | Expensive                                                                                                          | [51, 63 - 67]          | Rigenera system (once upon a time micrografts application)     |
| <b>Cellular skin substitutes Gene Therapy</b>                          | Skin regeneration, Epidermolysis bullosa                   | Transgenic epidermal Grafts                                                                                                                                               | Doubts on safety and effectiveness.                                                                                | [68 - 70]              | –                                                              |
| <b>Cellular skin substitutes Induced pluripotent stem cells</b>        | Skin regeneration.                                         | Avoid complication of immune system                                                                                                                                       | Doubts on safety.                                                                                                  | [60, 72 - 77]          | –                                                              |

|                                                                 |                                   |                                                                                                                                                                                                                                               |                                                                                  |                |   |
|-----------------------------------------------------------------|-----------------------------------|-----------------------------------------------------------------------------------------------------------------------------------------------------------------------------------------------------------------------------------------------|----------------------------------------------------------------------------------|----------------|---|
| <b>Cell free scaffolds<br/>Decellularization<br/>techniques</b> | Skin regeneration.                | Dermal replacement with superior biocompatibility and less immunogenicity                                                                                                                                                                     | Decellularization protocol negatively impact on matrix structure and orientation | [60, 103, 104] | – |
| <b>Cell free scaffolds<br/>Electrospinning</b>                  | Wound care and skin regeneration. | Nanofibrous polymer membrane with variable pore size, high surface area and oxygen permeability.<br>Combination with drugs (i.e. antibiotic) and antimicrobial loaded nanoparticles.                                                          | Not all biomaterials can be electrospun                                          | [105 - 110]    | – |
| <b>Cellular scaffolds.<br/>3D-bioprinting</b>                   | Skin regeneration.                | Tissues formed by layers with different cell density able to simulate the multi-tissue structure complexity.<br>Flexibility to control geometry at micro/ nano-cellular level.<br>Modulates cell-cell interaction in specific 3D environment. | Thickness of tissue is not suitable for clinically application.                  | [111 - 116]    | – |
